# Supplementary material
Source: ML conference proceedings conference paper supplement (https://openreview.net/forum?id=VPrir0p5b6)
Supplement: supplementary_material [file attachment]

560 **Supplementary Material: Continuous-Time Functional Diffusion Processes**

561 **A Reverse Functional Diffusion Processes**

562 In this Section, we review the mathematical details to obtain the backward FDP discussed in [Theorem 1](#).  
 563 Depending on the considered class of noise, different approaches are needed. First, we present  
 564 in [Appendix A.1](#) the conditions to ensure existence of the backward process, which we use if the  $C$   
 565 operator is an identity matrix,  $C = I$ . Then we move to a different approach in [Appendix A.2](#) for the  
 566 case  $C \neq I$ .

567 **A.1 Föllmer Formulation**

568 The work in [Föllmer \(1986\)](#) is based on a finite entropy condition, which we report here as [Condition 1](#).  
 569 One simple way to ensure that the condition is satisfied is to assume:

570 **Condition 1.** For a given  $k$ , define  $\mathbb{Q}_{(k)}$  to be the path measure corresponding to the (infinite) system

$$\begin{cases} dX_t^i = b^i(X_t, t)dt + dW_t^i, & i \neq k \\ dX_t^i = dW_t^k, & i = k. \end{cases} \quad (22)$$

571 We say that  $\mathbb{Q}$  satisfies the finite local entropy condition if  $\text{KL} [\mathbb{Q} \parallel \mathbb{Q}_{(k)}] < \infty, \forall k$ .

572 Define  $\mathcal{F}_t^{(i)} = \sigma(X_0^i, X_s^j, 0 \leq s \leq t, j \neq i)$ .

**Assumption 1.**

$$\int_0^T b^i(X_t, t)^2 dt + \sum_{j \neq i} \mathbb{E} \left[ \int_0^T \left( b^j(X_t, t) - \mathbb{E} \left[ b^j(X_t, t) \mid \mathcal{F}_t^{(i)} \right] \right)^2 dt \right] < \infty, \mathbb{Q}_{(i)} a.s. \quad (23)$$

573 Notice that if [Assumption 1](#) is true, then [Condition 1](#) holds ([Föllmer \(1986\)](#), Thm. 2.23)

574 **Theorem 3.** If  $\text{KL} [\mathbb{Q} \parallel \mathbb{Q}_{(k)}] < \infty$ , then  $\text{KL} [\hat{\mathbb{Q}} \parallel \hat{\mathbb{Q}}_{(k)}] < \infty$ .

575 *Proof.* The proof can be obtained by adapting the result of Lemma 3.6 of [Föllmer & Wakolbinger \(1986\)](#).  $\square$

577 This Theorem states that if the forward FDP path measure  $\mathbb{Q}$  satisfies the finite local entropy condition,  
 578 then also the reverse FDP path measure  $\hat{\mathbb{Q}}$  satisfies the finite local entropy condition.

579 **Theorem 4.** Let  $\mathbb{Q}$  be a finite entropy measure. Then:

$$\begin{cases} dX_t^k = b^k(X_t, t)dt + dW_t^k, & \text{under } \mathbb{Q} \\ d\hat{X}_t^k = \hat{b}^k(\hat{X}_t, t)dt + d\hat{W}_t^k, & \text{under } \hat{\mathbb{Q}} \end{cases} \quad (24)$$

580 where:

$$\frac{\partial \log \left( \rho_t^{(d)}(x^k \mid x^j, j \neq k) \right)}{\partial x^k} = \hat{b}^k(x, T-t) + b^k(x, t) \quad (25)$$

581 *Proof.* For the proof, we refer to Theorem 3.14 of [Föllmer & Wakolbinger \(1986\)](#).  $\square$

582 **A.2 Millet Formulation**

583 Let  $L^2(R) = \{x \in H : \sum r^i(x^i)^2 < \infty\}$ . For simplicity, we overload the notation of the letter  $K$ ,  
 584 and use it for generic constants, that might be different on a case by case basis.

**Assumption 2.**

$$\begin{aligned} \forall x \in L^2(R), \sup_t \left\{ \sum r^i (b^i(x, t))^2 \right\} + \sum (r^i)^2 &\leq K(1 + \sum r^i (x^i)^2) \\ \forall x, y \in L^2(R), \sup_t \left\{ \sum r^i (b^i(x, t) - b^i(y, t))^2 \right\} &\leq K \sum r^i (x^i - y^i)^2 \end{aligned}$$

585 This assumption is simply the translation of H1 from [Millet et al. \(1989\)](#) to our notation.

586 **Assumption 3.** *There exists an increasing sequence of finite subsets  $J(n), n \in \mathbb{N}, \cup_n J(n) = \mathbb{N}$  such*  
 587 *that  $\forall n \in \mathbb{N}, M > 0$  there exists a constant  $K(M, n)$  such that the following holds:*

$$\sup_t \left( \sup_{i \in J(n)} \left( \left( \sup_x |b^i(x, t)| : \sup_{j \in J(n)} |x^j| \leq M \right) + \sum_j r^j \right) \right) \leq K(M, n).$$

588 Again, this assumption is simply the translation of H5 from [Millet et al. \(1989\)](#) to our notation.

589 **Assumption 4.** *Either i):*

$$\forall x, y \in L^2(R), \sup_t \left\{ \sum r^i (b^i(x, t) - b^i(y, t))^2 \right\} \leq K \sum (r^i)^2 (x^i - y^i)^2,$$

590 *or ii):  $\forall i, b^i(x)$  is a function of  $x$  for at most  $M$  coordinates and*

$$\forall x, y \in L^2(R), \sup_t \left\{ \sum (r^i)^2 (b^i(x, t) - b^i(y, t))^2 \right\} \leq K \sum (r^i)^2 (x^i - y^i)^2.$$

591 This corresponds to satisfying either H3 or jointly H2 and H4 of [Millet et al. \(1989\)](#). For simplicity,  
 592 we can combine together the different assumptions into

593 **Assumption 5.** *Let [Assumption 2](#) [Assumption 3](#) and [Assumption 4](#) hold.*

594 Finally, we state required assumptions about the density:

595 **Assumption 6.** *Suppose that the initial condition is  $X_0 \in L^2(R)$ .*

596 • *Assume that the conditional law of  $x^i$  given  $x^j, j \neq i$  has density  $\rho_t^{(d)}(x^i | x^j, j \neq i)$  w.r.t*  
 597 *Lebesgue measure on  $\mathbb{R}$ .*

598 • *Assume that  $\int_{t_0}^1 \int_{D_J} |r^i \frac{d}{dx^i} (\rho_t^{(d)}(x^i | x^j, j \neq i))| dx^i \rho_t(dx^{j \neq i}) dt < \infty$ , for fixed subset*  
 599  *$J \subset \mathbb{N}, t_0 > 0$  and  $D_J = \{(\prod_{j \in J} K_j) \times (\prod_{j \notin J} \mathbb{R}), K_j$  compact in  $\mathbb{R}\} \cap L^2(R)$ .*

600 We reported in our notation the content of Theorem 4.3 of [Millet et al. \(1989\)](#). This can be used to  
 601 prove the existence of the backward process.

### 602 A.3 Proof of [Theorem 1](#)

603 If  $R = I$ , then we assume [Assumption 1](#). Consequently,  $\mathbb{Q}$  is a finite entropy measure. Then  
 604 [Theorem 4](#) holds, from which the desired result. If, instead  $R \neq I$ , then we require [Assumption 5](#), [As-](#)  
 605 [sumption 6](#). Application of Thm 4.3 of [Millet et al. \(1989\)](#) allows to prove the validity of [Theorem 1](#)  
 606 also in this case.

#### 607 A.3.1 Proof of [Corollary 1](#)

608 [Assumption 5](#) is required directly. We need to show that with the considered restrictions [Assumption 6](#)  
 609 is valid.

610 Since  $\sum_i r^i < \infty$ , then  $\sum_i (r^i)^2 = K_a < \infty$ . Moreover,  $(b^i(x^i, t))^2 < K_b^2 (x^i)^2$ . Then,  
 611  $\forall x \in L^2(R)$ , the following holds  $\sup_t \left\{ \sum r^i (b^i(x, t))^2 \right\} + \sum (r^i)^2 \leq \sum r^i K_b^2 (x^i)^2 + K_a \leq$   
 612  $\max(K_a, K_b^2) (1 + \sum r^i (x^i)^2)$ . Similarly,  $\forall x, y \in L^2(R)$  we have  $\sup_t \left\{ \sum r^i (b^i(x, t) -$   
 613  $b^i(y, t))^2 \right\} \leq \sum r^i K_b^2 (x^i - y^i)^2$ . Thus [Assumption 2](#) is satisfied.

614 Since  $b^i(x, t)$  is bounded and independent on  $t$ , [Assumption 3](#) is satisfied, as explicitly discussed in  
 615 [Millet et al. \(1989\)](#).

616 Finally, since  $b^i(x)$  is a function of  $x$  for  $M = 1$  coordinate, and  $\sup_t \left\{ \sum (r^i)^2 (b^i(x, t) -$   
 617  $b^i(y, t))^2 \right\} \leq \sum (r^i)^2 K_b^2 (x^i - y^i)^2$ , [Assumption 4](#) is satisfied.

618 Then, combined together [Assumption 5](#) holds.

619 **A.4 Girsanov Regularity**

620 **Condition 2.** Assume that  $\gamma_\theta(x, t)$  is an  $\hat{\mathcal{F}}$  measurable process and that either:

$$\mathbb{E}_{\hat{\mathbb{Q}}} \left[ \exp \left( \frac{1}{2} \int_0^T \left\| \gamma_\theta(\hat{X}_t, t) \right\|_{R^{\frac{1}{2}}H}^2 dt \right) \right] = \mathbb{E}_{\mathbb{Q}} \left[ \exp \left( \frac{1}{2} \int_0^T \left\| \gamma_\theta(X_t, t) \right\|_{R^{\frac{1}{2}}H}^2 dt \right) \right] < \infty, \quad (26)$$

621 or

$$\exists \delta > 0 : \mathbb{E}_{\hat{\mathbb{Q}}} \left[ \exp \left( \frac{1}{2} \left\| \gamma_\theta(\hat{X}_\delta, \delta) \right\|_{R^{\frac{1}{2}}H}^2 \right) \right] < \infty. \quad (27)$$

622 This is equivalent to the regularity condition in eq. 10.23 of [Da Prato & Zabczyk \(2014\)](#) or Proposition  
623 10.17 in [Da Prato & Zabczyk \(2014\)](#).

624 **A.5 Proof of KL divergence expression**

625 We leverage [Equation \(7\)](#) to express the Kullback-Leibler divergence as:

$$\begin{aligned} \text{KL} \left[ \hat{\mathbb{Q}} \parallel \hat{\mathbb{P}}^{\chi_T} \right] &= \mathbb{E}_{\hat{\mathbb{Q}}} \left[ \log \frac{d\hat{\mathbb{Q}}_0}{d\hat{\mathbb{P}}_0} + \log \frac{d\rho_T}{d\chi_T} \right] = \mathbb{E}_{\hat{\mathbb{Q}}} \left[ \log \frac{d\hat{\mathbb{Q}}_0}{d\hat{\mathbb{P}}_0} \right] + \text{KL} [\rho_T \parallel \chi_T] = \\ &\mathbb{E}_{\hat{\mathbb{Q}}} \left[ - \int_0^T \langle \gamma_\theta(\hat{X}_t, t), d\hat{W}_t \rangle_{R^{\frac{1}{2}}H} + \frac{1}{2} \int_0^T \left\| \gamma_\theta(\hat{X}_t, t) \right\|_{R^{\frac{1}{2}}H}^2 dt \right] + \text{KL} [\rho_T \parallel \chi_T] = \\ &\frac{1}{2} \mathbb{E}_{\hat{\mathbb{Q}}} \left[ \int_0^T \left\| \gamma_\theta(\hat{X}_t, t) \right\|_{R^{\frac{1}{2}}H}^2 dt \right] + \text{KL} [\rho_T \parallel \chi_T] = \frac{1}{2} \mathbb{E}_{\mathbb{Q}} \left[ \int_0^T \left\| \gamma_\theta(X_t, t) \right\|_{R^{\frac{1}{2}}H}^2 dt \right] + \text{KL} [\rho_T \parallel \chi_T]. \end{aligned}$$

626 Moreover, since

$$\text{KL} \left[ \hat{\mathbb{Q}} \parallel \hat{\mathbb{P}}^{\chi_T} \right] = \mathbb{E}_{\hat{\mathbb{Q}}} \left[ \log \frac{d\hat{\mathbb{Q}}_T}{d\hat{\mathbb{P}}^{\chi_T}} + \log \frac{d\rho_0}{d\chi_0} \right] \geq \text{KL} [\rho_0 \parallel \chi_0],$$

627 we can combine the two results and obtain [Equation \(8\)](#)

628 **A.6 Conditional score matching**

629 In this subsection we prove the equality in [Equation \(13\)](#):

$$\begin{aligned} \mathbb{E}_{\mathbb{Q}} \left[ \int_0^T \left\| \gamma_\theta(X_t, t) \right\|_{R^{\frac{1}{2}}H}^2 dt \right] &= \int_0^T \int_H \left\| \gamma_\theta(x, t) \right\|_{R^{\frac{1}{2}}H}^2 dt d\rho_t(x) = \\ &\int_0^T \int_H \left\| D_x \log \rho_{T-t}^{(d)}(x) - s_\theta(x, T-t) \right\|_{R^{\frac{1}{2}}H}^2 dt d\rho_t(x) = \\ &\int_0^T \int_{H \times H} \left\| D_x \log \rho_t^{(d)}(x) - s_\theta(x, t) \right\|_{R^{\frac{1}{2}}H}^2 dt d\rho_t(x, x_0) = \\ &\int_0^T \int_{H \times H} \left\| D_x \log \rho_t^{(d)}(x) - D_x \log \rho_t^{(d)}(x | x_0) + D_x \log \rho_t^{(d)}(x | x_0) - s_\theta(x, t) \right\|_{R^{\frac{1}{2}}H}^2 dt d\rho_t(x, x_0) = \\ &\int_0^T \int_{H \times H} \left\| D_x \log \rho_t^{(d)}(x) - D_x \log \rho_t^{(d)}(x | x_0) \right\|_{R^{\frac{1}{2}}H}^2 + \left\| D_x \log \rho_t^{(d)}(x | x_0) - s_\theta(x, t) \right\|_{R^{\frac{1}{2}}H}^2 + \\ &2 \left\langle D_x \log \rho_t^{(d)}(x) - D_x \log \rho_t^{(d)}(x | x_0), D_x \log \rho_t^{(d)}(x | x_0) - s_\theta(x, t) \right\rangle dt d\rho_t(x, x_0). \end{aligned}$$

630 To simplify the equality, we need to notice that:

$$\begin{aligned} \rho_t^{(d)}(x^i|x^{j \neq i})dx^i &= d\rho_t(x^i|x^{j \neq i}) = \int_{x_0} d\rho_t(x_0|x)d\rho_t(x^i|x^{j \neq i}) = \int_{x_0} d\rho_t(x^i, x_0|x^{j \neq i}) = \\ &\int_{x_0} d\rho_t(x^i|x_0, x^{j \neq i})d\rho_t(x_0|x^{j \neq i}) = dx^i \int_{x_0} \rho_t^{(d)}(x^i|x_0, x^{j \neq i})d\rho_t(x_0|x^{j \neq i}). \end{aligned}$$

631 Then, computing

$$\begin{aligned} \int_{x_0} \frac{d}{dx^i} \log \rho^{(d)}(x^i|x^{j \neq i}, x_0)d\rho_t(x, x_0) &= \int_{x_0} \frac{\frac{d}{dx^i} \rho^{(d)}(x^i|x^{j \neq i}, x_0)}{\rho^{(d)}(x^i|x^{j \neq i}, x_0)} d\rho_t(x, x_0) = \\ \int_{x_0} \frac{\frac{d}{dx^i} \rho^{(d)}(x^i|x^{j \neq i}, x_0)}{\rho^{(d)}(x^i|x^{j \neq i}, x_0)} d\rho_t(x^i|x^{j \neq i}, x_0)d\rho_t(x_0, x^{j \neq i}) &= \int_{x_0} \frac{d}{dx^i} \rho^{(d)}(x^i|x^{j \neq i}, x_0)dx^i d\rho_t(x_0, x^{j \neq i}) = \\ \int_{x_0} \frac{d}{dx^i} \rho^{(d)}(x^i|x^{j \neq i}, x_0)dx^i d\rho_t(x_0|x^{j \neq i})d\rho_t(x^{j \neq i}) &= \frac{d}{dx^i} \left( \int_{x_0} \rho^{(d)}(x^i|x^{j \neq i}, x_0)d\rho_t(x_0|x^{j \neq i}) \right) dx^i d\rho_t(x^{j \neq i}) = \\ \frac{d}{dx^i} \rho_t^{(d)}(x^i|x^{j \neq i})dx^i d\rho_t(x^{j \neq i}) &= \frac{d \log \rho_t^{(d)}(x^i|x^{j \neq i})}{dx^i} \rho_t^{(d)}(x^i|x^{j \neq i})dx^i d\rho_t(x^{j \neq i}) = \frac{d \log \rho_t^{(d)}(x^i|x^{j \neq i})}{dx^i} d\rho_t(x) \end{aligned}$$

632 Consequently:

$$\int_{H \times H} \left\langle D_x \log \rho_t^{(d)}(x) - D_x \log \rho_t^{(d)}(x|x_0), s_\theta(x, t) \right\rangle d\rho_t(x, x_0) = 0.$$

633 Combining together and rearranging the terms, we get the desired [Equation \(13\)](#).

## 634 A.7 Explicit expression of score function

635 As mentioned in the text, we consider the case  $f = 0$ . In this case, there exists a weak solution to  
636 [Equation \(1\)](#) as:

$$X_t = \exp(tA)X_0 + \int_0^t \exp((t-s)A)dW_s. \quad (28)$$

637 Consequently, the true score function has expression:

$$\begin{aligned}
\frac{d}{dx^i} \log \rho_t^{(d)}(x^i | x^{j \neq i}) &= \frac{\frac{d}{dx^i} \rho_t^{(d)}(x^i | x^{j \neq i})}{\rho_t^{(d)}(x^i | x^{j \neq i})} = \frac{\frac{d}{dx^i} \int_{x_0} \rho_t^{(d)}(x^i | x_0, x^{j \neq i}) d\rho_t(x_0 | x^{j \neq i})}{\rho_t^{(d)}(x^i | x^{j \neq i})} = \\
&= \frac{- \int_{x_0} (s^i)^{-1} (x^i - \exp(tb^i) x_0^i) \rho_t^{(d)}(x^i | x_0, x^{j \neq i}) d\rho_t(x_0 | x^{j \neq i})}{\rho_t^{(d)}(x^i | x^{j \neq i})} = \\
&= \frac{-(s^i)^{-1} \left( x^i \rho_t^{(d)}(x^i | x^{j \neq i}) - \int_{x_0} \exp(tb^i) x_0^i \rho_t^{(d)}(x^i | x_0, x^{j \neq i}) d\rho_t(x_0 | x^{j \neq i}) \right)}{\rho_t^{(d)}(x^i | x^{j \neq i})} = \\
&= \frac{-(s^i)^{-1} \left( x^i \rho_t^{(d)}(x^i | x^{j \neq i}) - \int_{x_0} \exp(tb^i) x_0^i \rho_t^{(d)}(x^i | x_0, x^{j \neq i}) d\rho_t(x_0 | x^{j \neq i}) \right)}{\rho_t^{(d)}(x^i | x^{j \neq i})} = \\
&= \frac{-(s^i)^{-1} \left( x^i \rho_t^{(d)}(x^i | x^{j \neq i}) - \int_{x_0^i} \exp(tb^i) x_0^i \rho_t^{(d)}(x^i | x_0^i, x^{j \neq i}) d\rho_t(x_0^i | x^{j \neq i}) \right)}{\rho_t^{(d)}(x^i | x^{j \neq i})} = \\
&= \frac{-(s^i)^{-1} \left( x^i \rho_t^{(d)}(x^i | x^{j \neq i}) - \int_{x_0^i} \exp(tb^i) x_0^i \rho_t^{(d)}(x^i | x_0^i, x^{j \neq i}) \rho^{(d)}(x_0^i | x^{j \neq i}) dx_0^i \right)}{\rho_t^{(d)}(x^i | x^{j \neq i})} = \\
&= \frac{-(s^i)^{-1} \left( x^i \rho_t^{(d)}(x^i | x^{j \neq i}) - \int_{x_0^i} \exp(tb^i) x_0^i \rho_t^{(d)}(x^i, x_0^i | x^{j \neq i}) dx_0^i \right)}{\rho_t^{(d)}(x^i | x^{j \neq i})} = \\
&= \frac{-(s^i)^{-1} \left( x^i \rho_t^{(d)}(x^i | x^{j \neq i}) - \int_{x_0^i} \exp(tb^i) x_0^i \rho_t^{(d)}(x_0^i | x) dx_0^i \right) \rho_t^{(d)}(x^i | x^{j \neq i})}{\rho_t^{(d)}(x^i | x^{j \neq i})} = \\
&= -(s^i)^{-1} \left( x^i - \int_{x_0^i} \exp(tb^i) x_0^i \rho_t^{(d)}(x_0^i | x) dx_0^i \right)
\end{aligned}$$

638 where  $s^i = r^i \frac{\exp(2b^i t) - 1}{2b^i}$ . This is exactly the desired Equation (11). Similar calculations allow to  
639 prove  $D_x \log \rho_t^{(d)}(x | x_0) = -\mathcal{S}(t)^{-1} (x - \exp(t\mathcal{A})x_0)$ .

## 640 B Fokker Planck equation

641 In this Section we discuss the infinite dimensional generalization of the classical Fokker Planck  
642 equation. We can associate to Eq. (1) the differential operator:

$$\mathcal{L}_0 u(x, t) = D_t u(x, t) + \underbrace{\frac{1}{2} \text{Tr} \{ R D_x^2 u(x, t) \}}_{\mathcal{L}u(x, t)} + \langle Ax + f(x, t), D_x u(x, t) \rangle, \quad x \in H, t \in [0, T], \tag{29}$$

643 where  $D_t$  is the time derivative,  $D_x, D_x^2$  are first and second order Fréchet derivatives in space.  
644 The domain of the operator  $\mathcal{L}_0$  is  $D(\mathcal{L}_0)$ , the linear span of real parts of functions  $u_{\phi, h} =$   
645  $\phi(t) \exp(i \langle x, h(t) \rangle)$ ,  $x \in H, t \in [0, T]$  where  $\phi \in C^1([0, T])$ ,  $\phi(T) = 0$ ,  $h \in C^1([0, T]; D(\mathcal{A}^\dagger))$ ,  
646 where  $\dagger$  indicates adjoint. Provided appropriate conditions are satisfied, see for example Bogachev  
647 et al. (2009, 2011), the time varying measure  $\rho_t(dx)dt$  exists, is unique, and solves the Fokker-Planck  
648 equation  $\mathcal{L}_0^\dagger \rho_t = 0$ .

## 649 C Uncertainty principle

650 We here clarify that Hilbert spaces of square integrable functions that are not, in general, simultane-  
651 ously homogeneous and separable. For example, while  $\mathbb{R}$  is homogeneous, the set of square integrable  
652 functions over  $\mathbb{R}$  is not separable, since the basis is the *uncountable* set  $\cos(2\pi\nu p), \sin(2\pi\nu p), \nu \in \mathbb{R}$ .  
653 Then, FDP requirements are not met, as we need a countable basis. Moreover, we would need in

654 general an infinite number of samples (grid over the whole  $\mathbb{R}$ ) to reconstruct the functions. Conversely,  
655 a set like the interval  $I = [0, 1] \subset \mathbb{R}$  has *countable* basis  $\cos(2\pi tp), \sin(2\pi tp), t \in \mathbb{Z}$  (and thus  
656 is separable) and, considering  $x$  to be band-limited, a sampling grid with finite cardinality would  
657 allow to reconstruct of the function. However,  $I$  is not homogeneous as no isometry group exists.  
658 Consequently, [Theorem 2](#) is not applicable. To fix the issue, one could naively think of extending any  
659 function defined over  $I$  to the whole  $\mathbb{R}$  by considering  $\bar{x}[p] = x[p], p \in I$  and  $\bar{x}[p] = 0, p \notin I$ . Obvi-  
660 ously, if  $x \in L_2(I)$  then  $\bar{x} \in L_2(\mathbb{R})$ . However, since  $\bar{x}$  has finite support, it cannot be bandlimited,  
661 making such an approach not a viable solution. In classical signal processing literature, the problem  
662 is usually referred to as the *uncertainty principle* ([Slepian, 1983](#)).

## 663 D A complete example

664 We present an example in which we cast [Equation \(20\)](#) for square integrable functions over the  
665 interval  $I = [0, 1], L^2(I)$ . In this case, one natural selection for the basis is the Fourier basis<sup>2</sup>  
666  $e^k = \{ \dots, \exp(-j2\pi 2p), \exp(-j2\pi p), 1, \exp(j2\pi p), \exp(j2\pi 2p), \dots \}$ . Assume the operator  $\mathcal{A}$   
667 to be a pseudo-differential operator, such that  $\langle \mathcal{A}x, e^k \rangle = b^k x^k$ . Also, assume that  $b^k, r^k$  are selected  
668 such that conditions of [Corollary 1](#) are met, and consequently the backward process exists. Since  
669 we are working with samples collected on the grid  $x[i/N]$  we first map the samples to the frequency  
670 domain, and then build a Fourier-like representation with a finite set of sinusoids. We then define the  
671 mapping  $\mathfrak{F}(z^i)^k \stackrel{\text{def}}{=} \sum_{i=0}^{N-1} z^i \exp(-j2\pi k \frac{i}{N})$  and its inverse  $\mathfrak{J}(z^i)^k \stackrel{\text{def}}{=} N^{-1} \sum_{i=0}^{N-1} z^i \exp(j2\pi k \frac{i}{N})$ .  
672 This suggests to consider the following expression for the interpolating functions:

$$\xi^i = \frac{1}{N} \sum_{k=0}^{N-1} e^k \exp\left(-j2\pi k \frac{i}{N}\right) = \frac{1}{N} \sum_{k=0}^{N-1} \exp\left(j2\pi k\left(p - \frac{i}{N}\right)\right).$$

673 Those functions are indeed nothing but a frequency truncated version of the sinc function, which is  
674 the classical reconstruction function of the sampling theorem on 1-D signals. Moreover  $\langle \xi^i, \zeta^k \rangle =$   
675  $\delta(i - k)$ . We are now ready to show *i*) the expression of the forward process, *ii*) the expression of the  
676 parametric score function  $s_\theta$  and  $\gamma_\theta$ , *iii*) the computation of the ELBO and finally *iv*) the expression  
677 for the backward process. We defer all detailed derivations to the Appendix.

678 The forward process defined in [Equation \(20\)](#) has expression:

$$dX_t[k/N] = \mathfrak{J}\left(b^l \mathfrak{F}(X_t[i/N])^l\right)^k dt + dW_t[k/N], \quad k = 1, \dots, |Z|, \quad (30)$$

679 where  $dW_t[k/N] \simeq \mathfrak{F}(dW_t^i)^k$ . Simple calculations show that  $X_t[k/N]$  is equivalent in distribution to

$$X_t[k/N] = \mathfrak{J}\left(\exp(b^l t) \mathfrak{F}(X_0[i/N])^l + \sqrt{c^l} \epsilon^l\right)^k, \quad (31)$$

680 where  $s^l = \langle \mathcal{S}(t), e^l \rangle = r^l \frac{\exp(2b^l t) - 1}{2b^l}$  and  $\epsilon^l \sim \mathcal{N}(0, 1)$ , allowing simulation of the forward process  
681 in a single step.

682 The parametric score function can be approximated as:

$$\begin{aligned} s_\theta \left( \sum_i X_t[i/N] \xi^i, t \right) [i/N] = & \quad (32) \\ & - \mathfrak{J} \left( \frac{\mathfrak{F}(X_t[i/N])^k - \exp(b^k t) \mathfrak{F}(n(g(X_t[l/N]), t, \theta) [l/N])^k}{s^k} \right)^i. \end{aligned}$$

683 Similarly:

$$\begin{aligned} \tilde{\gamma}_\theta \left( \sum_i X_t[i/N] \xi^i, \sum_i X_0[i/N] \xi^i, t \right) [i/N] = & \quad (33) \\ & - \mathfrak{J} \left( \frac{\exp(b^k t)}{s^k} \left( \mathfrak{F}(n(g(X_t[l/N]), t, \theta) [l/N])^k - X_0[l/N]^k \right) \right)^i. \end{aligned}$$

<sup>2</sup>We stress that although we should consider a real Hilbert space, we select the complex exponential to avoid cluttering the notation. It is possible to select  $\{\cos(2\pi p), \sin(2\pi p), \cos(2\pi 2p), \sin(2\pi 2p), \dots\}$  as a basis, and redoing the calculations in this Section we can obtain a functionally equivalent scheme as the one with the real basis.

684 Combining Equation (31) and Equation (33) we can fully characterize the training objective defined in  
 685 Equation (19). Then, it is possible to optimize the value of the parameters  $\theta$  with any gradient-based  
 686 optimizer.

687 Finally, the backward process approximation is expressed as:

$$d\hat{X}_t^{[k/N]} = -\mathfrak{J} \left( b^l \mathfrak{F}(\hat{X}_t^{[i/N]})^l \right)^k + \mathfrak{J} \left( r^l \mathfrak{F} \left( s_\theta \left( \sum_i \hat{X}_t^{[i/N]} \xi^i, T-t \right)^{[i/N]} \right)^l \right) dt + dW_t^{[k/N]} \quad (34)$$

$$k = 1, \dots, |Z|,$$

688 from which new samples can be generated.

### 689 D.1 Proofs

690 We start by proving Equation (30). Starting from the drift term of Equation (20), we have the  
 691 following chain of equalities:

$$\begin{aligned} \left\langle \mathcal{A} \sum_{i=0}^{N-1} X_t^{[i/N]} \xi^i, \zeta^k \right\rangle &= \left\langle \sum_{i=0}^{N-1} X_t^{[i/N]} \mathcal{A} \frac{1}{N} \sum_{l=0}^{N-1} e^l \exp\left(-j2\pi l \frac{i}{N}\right), \zeta^k \right\rangle = \\ &= \left\langle \sum_{i=0}^{N-1} X_t^{[i/N]} \frac{1}{N} \sum_{l=0}^{N-1} b^l e^l \exp\left(-j2\pi l \frac{i}{N}\right), \zeta^k \right\rangle = \\ &= \sum_{i=0}^{N-1} X_t^{[i/N]} \frac{1}{N} \sum_{l=0}^{N-1} b^l \exp(j2\pi l k/N) \exp(-j2\pi l i/N) = \\ &= \sum_{l=0}^{N-1} b^l \exp(j2\pi l k/N) \mathfrak{F}(X_t^{[i/N]})^l = \\ &= \mathfrak{J} \left( b^l \mathfrak{F}(X_t^{[i/N]})^l \right)^i. \end{aligned}$$

692 The noise term  $dW_t^{[k/N]}$  is approximated as:

$$dW_t^{[k/N]} = \langle dW_t, \zeta^k \rangle = \left\langle \sum_{i=0}^{\infty} dW_t^i e^i, \zeta^k \right\rangle = \sum_{i=0}^{\infty} dW_t^i \exp\left(j2\pi i \frac{k}{N}\right) \simeq \mathfrak{F}(dW_t^i)^k,$$

693 where we are truncating the sum. The score term has expression:

$$\begin{aligned} s_\theta \left( \sum_i X_t^{[i/N]} \xi^i, t \right) &= -(\mathcal{S}(t))^{-1} \left( \sum_i X_t^{[i/N]} \xi^i - \exp(t\mathcal{A}) n(g(X_t^{[i/N]}), t, \theta) \right) = \\ &= \underbrace{\mathfrak{F}(X_t^{[i/N]})^{\text{def}} C_t^k}_{\sum_i X_t^{[i/N]} \langle \xi^i, (e^k)^\dagger \rangle} - \exp(b^k t) \langle n(g(X_t^{[i/N]}), t, \theta), (e^k)^\dagger \rangle \\ &= - \sum_k \frac{\sum_i X_t^{[i/N]} \langle \xi^i, (e^k)^\dagger \rangle - \exp(b^k t) \langle n(g(X_t^{[i/N]}), t, \theta), (e^k)^\dagger \rangle}{s^k} e^k = \\ &= - \sum_k \frac{C_t^k - \exp(b^k t) \langle n(g(X_t^{[i/N]}), t, \theta), \exp(-j2\pi k p) \rangle}{s^k} e^k \simeq \\ &= - \sum_k \frac{C_t^k - \exp(b^k t) (N^{-1} \sum_r n(g(X_t^{[i/N]}), t, \theta) \left[ \frac{r}{N} \right], \exp(-j2\pi k \frac{r}{N}))}{s^k} e^k, \end{aligned}$$

694 where the approximation is due to the substitution of explicit scalar product with the discretized  
 695 version through  $\mathfrak{F}$ . When evaluated on the grid of interest:

$$\begin{aligned}
 s_{\theta} \left( \sum_i X_t [i/N] \xi^i, t \right) [i/N] = & \\
 - \sum_k \frac{(C_t^k - \exp(b^k t) (N^{-1} \sum_r n(g(X_t [i/N]), t, \theta) [\frac{r}{N}], \exp(-j2\pi k \frac{r}{N})))}{s^k} \exp(j2\pi k i/N) = & \\
 - \mathfrak{J} \left( \frac{\mathfrak{F}(X_t [i/N]) - \exp(b^k t) \mathfrak{F}(n(g(X_t [i/N]), t, \theta) [i/N])}{s^k} \right). &
 \end{aligned}$$

696 The value of  $\tilde{\gamma}_{\theta}$ , [Equation \(33\)](#) and the expression of the backward process, [Equation \(34\)](#), are  
 697 obtained similarly, considering the above results.

## 698 E Implementation Details and Additional Experiments

699 In all experiments we use the the complex Fourier basis for the Hilbert spaces, indexed by  $k$ . This  
 700 extends to the 2-dimensional case what we described in [Appendix D.1](#). As stated in the main paper,  
 701 our practical implementation sets  $f = 0$ : then, we only need to specify the value for the parameters  
 702  $b^k, r^k$ . In our implementation we consider an extended class of SDEs that include time-varying  
 703 multiplying coefficients in front of the drift and diffusion terms, as done for example in the Variance  
 704 Preserving SDE originally described by [Song & Ermon \(2020\)](#). This can be simply interpreted as the  
 705 time-rescaled version of autonomous SDEs.

### 706 E.1 Architectural details

707 In our implementation, we use the original INR architecture ([Sitzmann et al., 2020](#)). For the specific  
 708 denoising task we consider in our model, we extend the input of the network architecture to include  
 709 the corrupted version of the input sample and the diffusion time  $t$ , in addition to the spatial coordinates.  
 710 We emphasize that our architectural is simple, and does not require self-attention mechanisms ([Song  
 711 & Ermon, 2020](#)). The non-linearity we use in our network is a Gabor wavelet activation function  
 712 ([Saragadam et al., 2023](#)). Furthermore, we found beneficial the inclusion of skip connections.

713 As stated in the main paper, we consider the *modulation* approach to INRS. In particular, we  
 714 implement the meta-learning scheme described by [Dupont et al. \(2022b\)](#); [Finn et al. \(2017\)](#). The outer  
 715 loop is dedicated to learning the base parameters of the model, while the inner loop focuses on refining  
 716 the base parameters for each input sample. In the outer loop, the optimization algorithm is AdaBelief  
 717 ([Zhuang et al., 2020](#)), sweeping the learning rate over  $1e-4, 1e-5, 1e-6$ . We found the use of a cosine  
 718 warm-up schedule to be beneficial for avoiding training instabilities and convergence to sub-optimal  
 719 solutions. The inner loop is implemented by using three steps of stochastic gradient descent (SGD),  
 720 where the per-parameter learning rate are found using the Meta-SGD scheme described by [Dupont  
 721 et al. \(2022b\)](#).

### 722 E.2 Additional results

#### 723 E.2.1 A Toy example.

724 We here present some qualitative examples on a synthetic data-set of functions  $\in L([-1, 1])$ , and  
 725 therefore consider the settings described in [Appendix D](#). The *Quadratic* data is generated as in  
 726 ([Phillips et al., 2022](#)), i.e.  $X_0[p] = qp^2 + \epsilon$ , where  $\epsilon \sim \mathcal{N}(0, 0.1)$  and  $q$  is a binary random variable  
 727 that take values  $\{-1, 1\}$  with equal probability. Concerning the design of the forward SDE, we  
 728 select  $b^k = \min(\sqrt{k}, 10)$  and  $r^k = k^{-2}$  (thus satisfying [Corollary 1](#)). The real data is generated  
 729 considering a grid of 100 equally spaced points. We can see in [Figure 2](#) some qualitative results. On  
 730 the left real (red) and generated through FDP (blue) samples show good agreement. Center and right  
 731 plots depict some example of diffused samples for times 0.2 and 1.0 respectively.



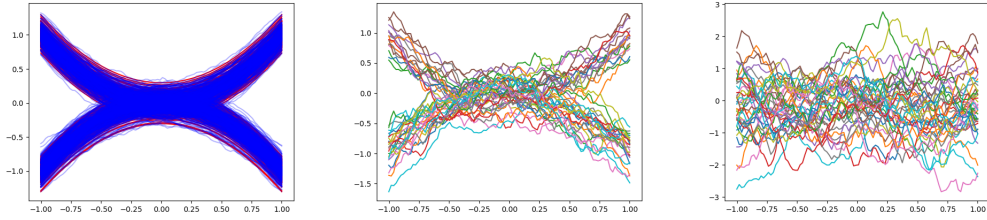

**Figure 2:** Left: real (red) and generated samples (blue). Center and Right: Samples diffused for times 0.2 and 1.0 respectively.

## 732 E.2.2 MNIST data-set

733 We evaluate our approach on a simple data-set, using MNIST  $32 \times 32$  (LeCun et al., 2010). In this  
 734 experiment, we compare our method against the baseline score-based diffusion models from Song  
 735 et al. (2021), which we take from the official code repository [https://github.com/yang-song/score\\_sde](https://github.com/yang-song/score_sde). The baseline implements the score network using a U-NET with self-attention and skip  
 736 connections, as indicated by current best practices, which amounts to  $O(10^8)$  parameters.  
 737

738 Instead, our method uses a score-network/INR implemented as a simple MLP with 8 layers and 128  
 739 neurons in each layer. The activation function is a sinusoidal non-linearity (Sitzmann et al., 2020).  
 740 Our model counts  $O(10^5)$  parameters. We consider an SDE with parameters  $r^{k,m} = \frac{176}{k^2+m^2+2}$ <sup>3</sup> and

741  $b^{k,m} = \min((k^2 + m^2 + 0.3)^{-1} + \left(\frac{r^{k,m}}{33}\right)^{\frac{1}{4}}, 3.6)$ . These values have been determined empirically  
 742 by observing the power spectral density of the data-set, to ensure a well-behaved Signal to Noise  
 743 ratio evolution throughout the diffusion process for all frequency components.

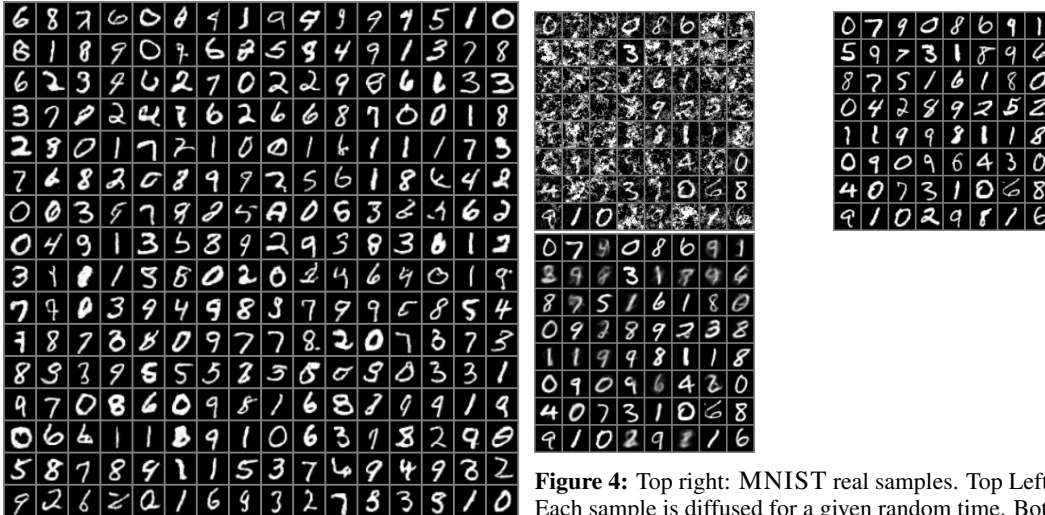

744

**Figure 3:** MNIST samples generated according to our proposed FDPs.

**Figure 4:** Top right: MNIST real samples. Top Left: Each sample is diffused for a given random time. Bottom: output of INR for corresponding input noisy image.

745 In Figure 3 we report un-curated samples generated according to our FDP. In Figure 4 we present  
 746 instead various “intermediate” noisy versions of the training data, to illustrate the kind of noise we  
 747 use to train the score network, and the output of the denoising INR. We also report the Fréchet  
 748 Inception Distance (FID) score computed using 16k samples (lower is better). For the baseline we  
 749 obtain FID=0.05, whereas for the proposed method we obtain FID=0.43. Although the FID score is in

<sup>3</sup>Strictly speaking, the sum of the series  $r^{k,m}$  is not convergent. We experimented changing the decay to ensure convergence, but we observed no numerical difference with the settings we used. It is an interesting avenue for future work to study if this approximation has an impact for higher-resolution data-sets.

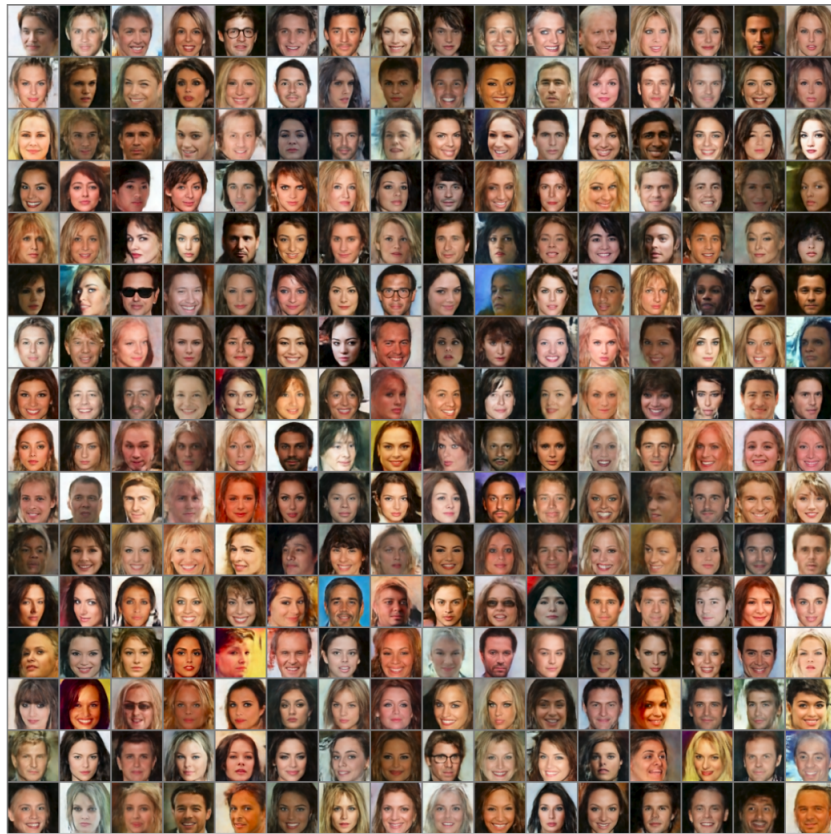

Figure 5: Uncurated CELEBA samples

750 favor of the baseline, we believe that our results – obtained with a simple MLP – are very promising,  
 751 as further corroborated by experiments on a more complex dataset, which we show next.

### 752 E.2.3 CELEBA data-set

753 For the CELEBA data-set we considered the same SDE as for the MNIST experiment. Results  
 754 reported in the main paper have been obtained using a numerical integration scheme with 300 steps  
 755 of a variant of the predictor-corrector scheme of (Song & Ermon, 2020), which we adapted to the  
 756 SDEs we consider in our work. In Figure 5 we report additional un-curated samples obtained with the  
 757 configuration described above. We proceed to describe further experiments in the following section.

758 **Conditional generation.** In the following, we consider three use-cases for conditional generation:  
 759 in-painting, de-blurring, and colorization, which we describe next. All these additional experiments  
 760 were completed using the same architecture and configuration of the unconditional generation  
 761 described above.

762 **In-painting.** We perform in-painting experiments by adopting the same approach described by Song  
 763 & Ermon (2020), and report results in Figure 6. Original images (left-column of Figure 6) are masked  
 764 (center-column of Figure 6), where we set the value corresponding to the missing pixels to 0. The  
 765 right column of Figure 6 shows the results of the in-painting scheme where, qualitatively, it is possible  
 766 to observe that the conditional generation is able to fill the missing portion of the images while  
 767 maintaining good semantic coherence.

768 **De-blurring.** Our FDPs are naturally suited for the de-blurring use-case, as shown in Figure 8. In  
 769 this experiment, we take the original images (left column of Figure 8) and filter them with a low  
 770 pass filter (center column of Figure 8). The de-blurring scheme is implemented as the in-painting

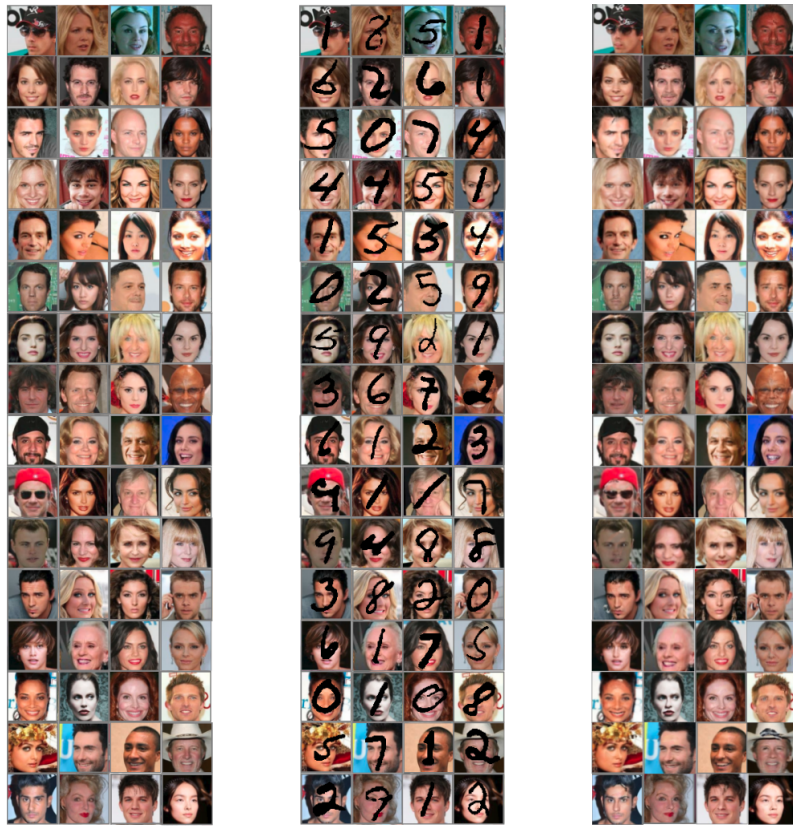

**Figure 6:** In-painting experiment. Left: real samples, Center: Masked samples, Right: Reconstructed samples

771 approach described by [Song & Ermon \(2020\)](#), where the only difference is that the masking at each  
 772 update is applied in the frequency domain. The right column of [Figure 8](#) shows that our technique  
 773 gracefully recovers missing details and is capable of producing high quality images conditioned on  
 774 the distorted inputs.

775 **Colorization.** In this use-case, we adapt the approach from [\(Song & Ermon, 2020\)](#) to our setting.  
 776 [Figure 7](#) depicts qualitative results of the colorization experiment, confirming the flexibility of the  
 777 proposed scheme.

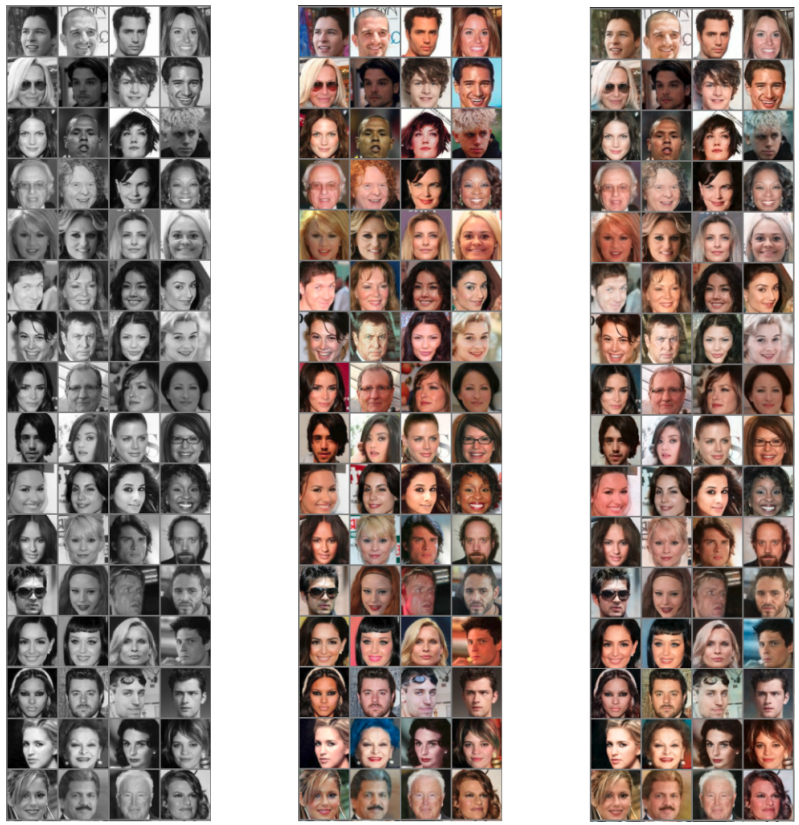

**Figure 7:** Colorization experiment. Left: real samples, Center: Gray-scale samples, Right: Reconstructed samples

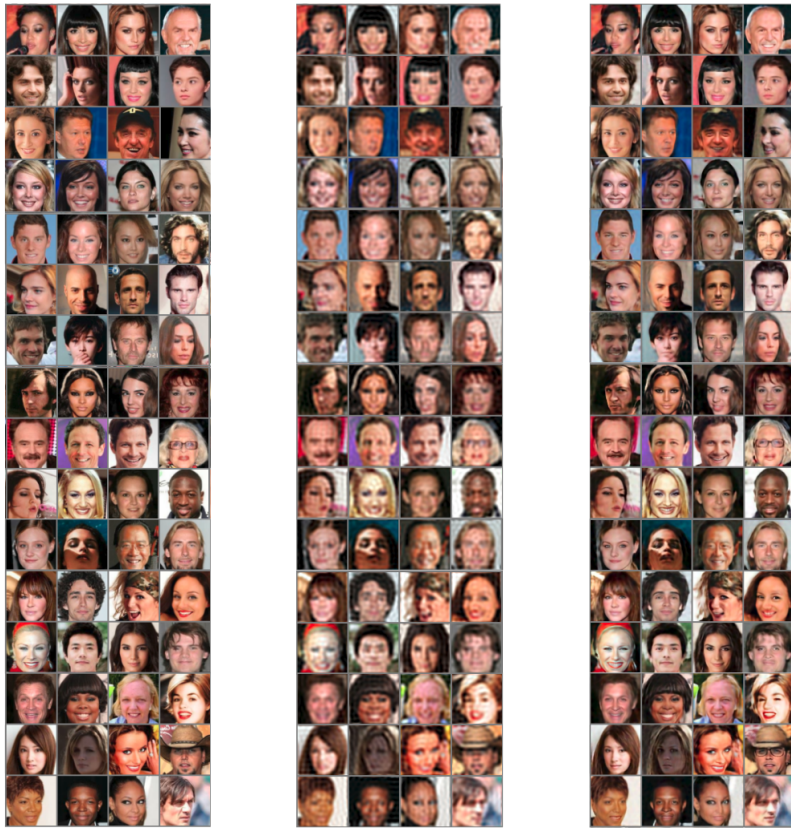

**Figure 8:** De-blurring experiment. Left: real samples, Center: blurred samples, Right: Reconstructed samples
